# Supplementary material for: CNBP restricts SARS-CoV2 by regulating IFN and disrupting RNA-protein condensates
Source: PubMed Central journal article supplement (PMC9094105; doi:10.21203/rs.3.rs-1576788/v1), 2022-05-02
Supplement: NIHPPRS1576788V1-supplement-1.pdf [file NIHPPRS1576788V1-supplement-1.pdf]

| Gene                 | Forward primer                                | Reverse primer                  |
|----------------------|-----------------------------------------------|---------------------------------|
| <b>Q-PCR Primers</b> |                                               |                                 |
| SARS-CoV2-N          | CTCTGTAGATCTGTTCTCTAAACGAAC                   | GGTCCACCAAACGTAATGCG            |
| SARS-CoV2-Nsp14      | TGGGGYTTTACRGGTAACCT                          | AACRCGCTTAACAAAGCACTC           |
| HCoV-OC43-N          | AGGAAGGTCTGCTCCTAATTC                         | TGCAAAGATGGGGAAGTGTGGG          |
| HCoV-OC43-M          | GGCTTATGTGGCCCCTTACT                          | GGCAAATCTGCCAAGAATA             |
| RSV-A2               | GCTCTTAGCAAAGTCAAGTTGAATGA                    | TGCTCCGTTGGATGGTGTATT           |
| Human IFN $\beta$    | GTCTCCTCAAATTGCTCTC                           | ACAGGAGCTTCTGACTACTGA           |
| Human IFN $\alpha$   | CACACAGGCTCCAGGCATTC                          | TCTTCAGCACAAAGGACTCATCTG        |
| Human RSAD2          | CTTTGTGCTGCCCTTGAGGAA                         | CTCTCCCGGATCAGGCTTCCA           |
| Human HPRT           | ATCAGACTGAAGAGCTATTGTAATGA                    | TGGCTTATATCCAACACTTCGTG         |
| murine IFN $\beta$   | ATAAGCAGCTCCAGCTCAA                           | CTGTCTGCTGGTGGAGTTCA            |
| murine TNF- $\alpha$ | GGTGCCTATGTCTCAGCCTCTT                        | GCCATAGAAGTATGAGAGGGAG          |
| murine IL12 $\beta$  | GGAAGCACGGCAGCAGAATA                          | AACTTGAGGGAGAAGTAGGAATGG        |
| murine IL10          | CGGGAAGACAATAACTGCACCC                        | CGGTTAGCAGTATGTTGTCCAGC         |
| murine IL1 $\beta$   | CGGCACACCCACCCTG                              | AAACCGTTTTTCCATCTTCTTCT         |
| murine GAPDH         | TGGCAAAGTGGAGATTGTTGCC                        | AAGATGGTGATGGGCTTCCCG           |
| <b>IVT Primers</b>   |                                               |                                 |
| 5-UTR                | TAATACGACTCACTATAGGGATTAAAGGTTTATACCTTCCCAG   | AGA ACG TTC CGT GTA CCA AGC AA  |
| 3-UTR                | TAATACGACTCACTATAGGGCAG TAG GGG AAC TTC TCC T | TTT TTG TCA TTC TCC TAA GAA GCT |
| 5K                   | TAATACGACTCACTATAGGGCTCCACACGCAAGTTGT         | ATT GGT TGC TCT GTG AAA TAA     |
| 10K                  | TAATACGACTCACTATAGGGTTCTGATGTTCTTTACCAA       | ACC CTT GAT TGT TCT TTT CAC TGC |
| 20K                  | TAATACGACTCACTATAGGGTTGATGGTCAAGTAGACTTA      | ATC ACC AAT CAA AGT TGA ATC T   |
| <b>sgRNAs</b>        |                                               |                                 |
| hCNBP sgRNA1         | CACCGCCGTGTGCAGACCCGCGTG                      | AAACCACGCGGGTCTGCACACGGC        |
| hCNBP sgRNA2         | CACCGCGTCCGAGTCTCCGCCGCTG                     | AAACCAGCGGGGAGACTCGGACGC        |
| hCNBP sgRNA3         | CACCGAAGACGGCTCGCAAGGTAG                      | AAACCTACCTTGCAGCCGTCTTC         |
